# Supplementary material for: Cul3 and insomniac are required for rapid ubiquitination of postsynaptic targets and retrograde homeostatic signaling
Source: PubMed Central journal article supplement (PMC6611771; doi:10.1038/s41467-019-10992-6), 2019-07-05
Supplement: 41467_2019_10992_MOESM1_ESM.pdf [file 41467_2019_10992_MOESM1_ESM.pdf]

## Supplementary Information

***insomniac* and *Cul3* are required for rapid ubiquitination of postsynaptic targets and retrograde homeostatic signaling**

***Kikuma et al.***

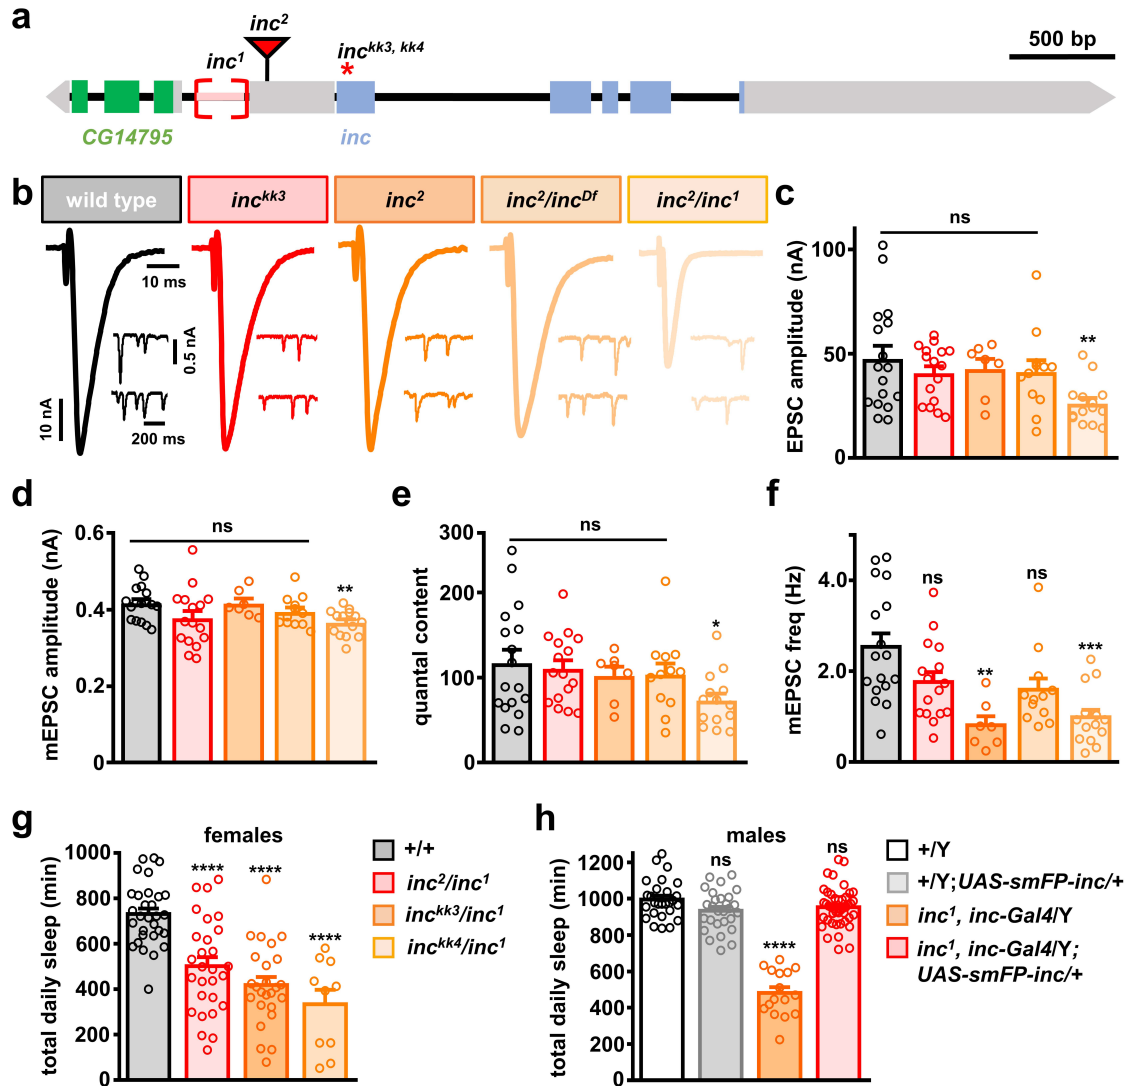

**Supplementary Figure 1: *inc* mutants generated by CRISPR/Cas9 gene editing exhibit normal baseline transmission and the expected defects in sleep behavior.** (a) Schematic of the *Drosophila inc* locus. The deleted region of *inc*<sup>1</sup>, the pBac transposon insertion site of *inc*<sup>2</sup>, and the CRISPR-induced indel mutations in *inc*<sup>kk3</sup> and *inc*<sup>kk4</sup> (\*) are shown. (b) Representative electrophysiological traces of EPSCs and mEPSCs for wild type (*w*<sup>1118</sup>), *inc*<sup>kk3</sup>, *inc*<sup>2</sup>, *inc*<sup>2</sup>/*inc*<sup>Df</sup>, and *inc*<sup>2</sup>/*inc*<sup>1</sup> mutants. While *inc*<sup>2</sup>/*inc*<sup>1</sup> mutants show reduced synaptic transmission, baseline synaptic transmission is largely normal in the other *inc* alleles. Quantification of average EPSC amplitude (c), mEPSC amplitude (d), quantal content (e), and mEPSC frequency (f) values in wild type (*w*<sup>1118</sup>, n=17), *inc*<sup>kk3</sup> (n=16), *inc*<sup>2</sup> (n=7), *inc*<sup>2</sup>/*inc*<sup>Df</sup> (n=12), and *inc*<sup>2</sup>/*inc*<sup>1</sup> (n=14) mutants. (g) Quantification of average daily sleep in female flies of the indicated genotype. *inc*<sup>kk3</sup>/*inc*<sup>1</sup> and *inc*<sup>kk4</sup>/*inc*<sup>1</sup> females show reduced daily sleep, similar to *inc*<sup>1</sup>/*inc*<sup>2</sup> transheterozygotes (wild type, n=30; *inc*<sup>2</sup>/*inc*<sup>1</sup>, n=28; *inc*<sup>kk3</sup>/*inc*<sup>1</sup>, n=25; *inc*<sup>kk4</sup>/*inc*<sup>1</sup>, n=10). (h) Expression of *UAS-smFP-inc* driven by *inc-Gal4* restores sleep to wild-type levels in male *inc*<sup>1</sup> mutants (wild type, n=27; *UAS-smFP-inc*/+, n=28; *inc*<sup>1</sup>/*inc-Gal4*/Y, n=16; *inc*<sup>1</sup>/*inc-Gal4*/Y;*UAS-smFP-inc*/+, n=43). Asterisks indicate statistical significance using a one-way ANOVA followed by Tukey's multiple comparison test: (\*) p<0.05; (\*\*) p<0.01; (\*\*\*) p<0.001; (\*\*\*\*) p<0.0001, (ns) not significant. Error bars indicate ±SEM. n values indicate biologically independent cells (c-f), or biologically independent animals for sleep behavior (g-h). Additional statistical information can be found in Supplementary Table 3. Source data are provided in the Source Data file.

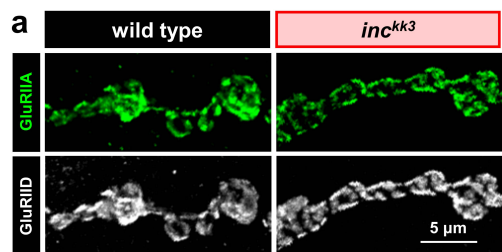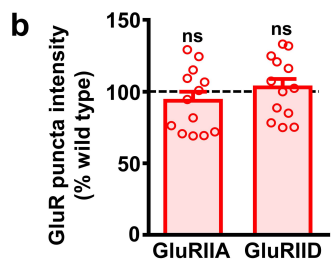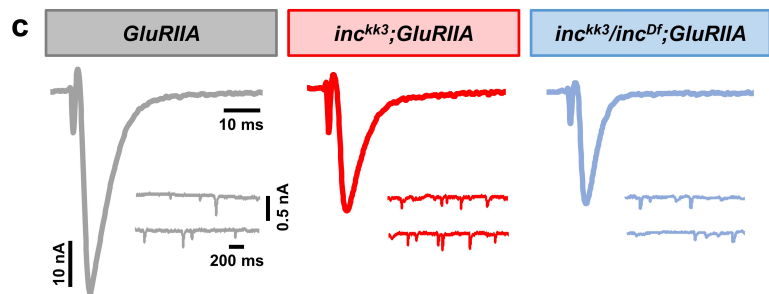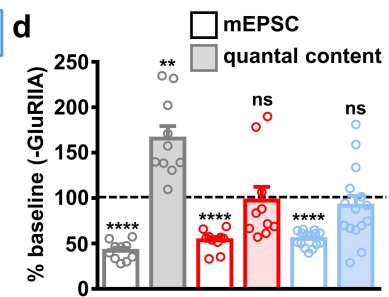

**Supplementary Figure 2: *inc* is required for the chronic expression of PHP.** **(a)** Representative images from wild type and *inc<sup>kk3</sup>* mutant NMJs immunostained with antibodies against the postsynaptic glutamate receptor subunits GluRIIA and GluRIID. No alteration in glutamate receptor levels is observed in *inc* mutants. **(b)** Quantification of mean fluorescence intensity levels of GluRIIA and GluRIID (wild type, n=10; *inc<sup>kk3</sup>*, n=13). **(c)** Representative EPSC and mEPSC traces from the indicated genotypes. PHP fails to be expressed in *inc<sup>kk3</sup>* mutants when combined with *GluRIIA* mutants (*inc<sup>kk3</sup>;GluRIIA<sup>SP16</sup>*). **(d)** Quantification of mEPSC and quantal content values in *GluRIIA* (n=10), *inc<sup>kk3</sup>;GluRIIA* (n=10), *inc<sup>kk3</sup>/inc<sup>Df</sup>;GluRIIA* (n=15) normalized to baseline conditions (-*GluRIIA*). Asterisks indicate statistical significance using a Student's t test: (\*\*) p<0.01; (\*\*\*\*) p<0.0001, (ns) not significant. Error bars indicate ±SEM. n values indicate biologically independent cells. Additional statistical information and absolute values for normalized data can be found in Supplementary Table 3. Source data are provided in the Source Data file.

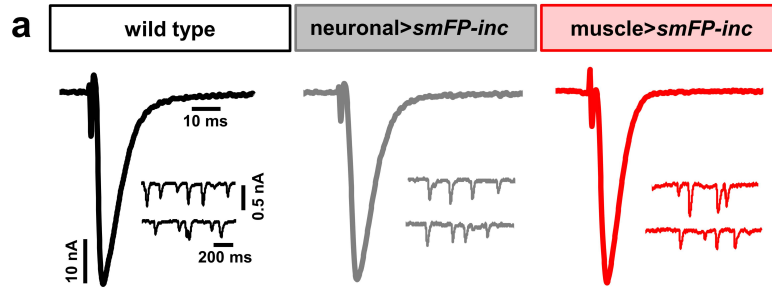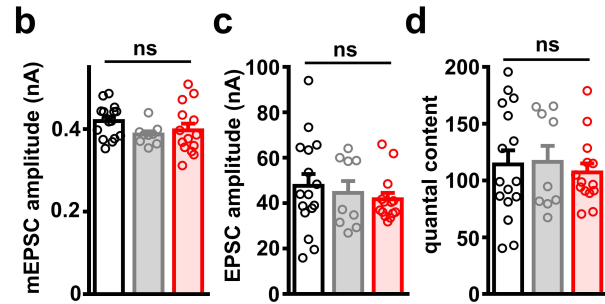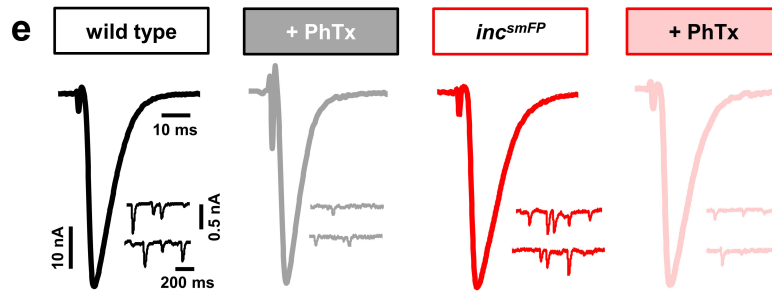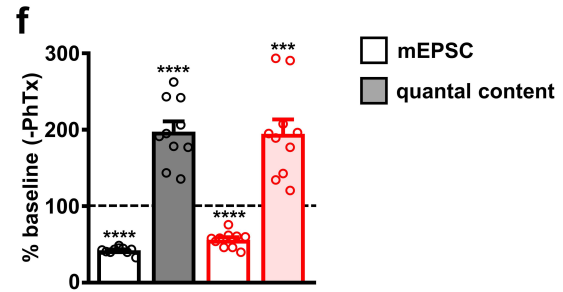

**Supplementary Figure 3: Overexpression and endogenous tagging of *inc* does not perturb baseline neurotransmission or PHP expression.** **(a)** Representative EPSC and mEPSC traces of wild type, neuronal *inc* overexpression (neuronal>*smFP-inc*: *OK371-Gal4/UAS-smFP-inc*), and muscle *inc* overexpression (muscle>*smFP-inc*: *UAS-smFP-inc/+;MHC-Gal4/+*). Quantification of mEPSC amplitude **(b)**, EPSC amplitude **(c)**, and quantal content **(d)** values from wild type (n=16), neuronal>*smFP-inc* (n=9), and muscle>*smFP-inc* (n=14). PHP is expressed in these genotypes after PhTx application (Supplementary Table 3). **(e)** Representative EPSC and mEPSC traces from wild type and endogenously tagged *inc<sup>smFP</sup>* before and after PhTx application. Synaptic transmission and PHP function similarly to wild type in *inc<sup>smFP</sup>*. **(f)** Quantification of average mEPSC amplitude and quantal content values following PhTx application relative to baseline (-PhTx) (wild type baseline, n=10; *inc<sup>smFP</sup>* baseline n=11; wild type + PhTx, n=10; *inc<sup>smFP</sup>*+ PhTx, n=10). Asterisks indicate statistical significance using a one-way ANOVA followed by Tukey's multiple comparison test (b-d) or a Student's t test (f): (\*\*\*) p<0.001; (\*\*\*\*) p<0.0001, (ns) not significant. Error bars indicate ±SEM. n values indicate biologically independent cells. Additional statistical information and absolute values for normalized data can be found in Supplementary Table 3. Source data are provided in the Source Data file.

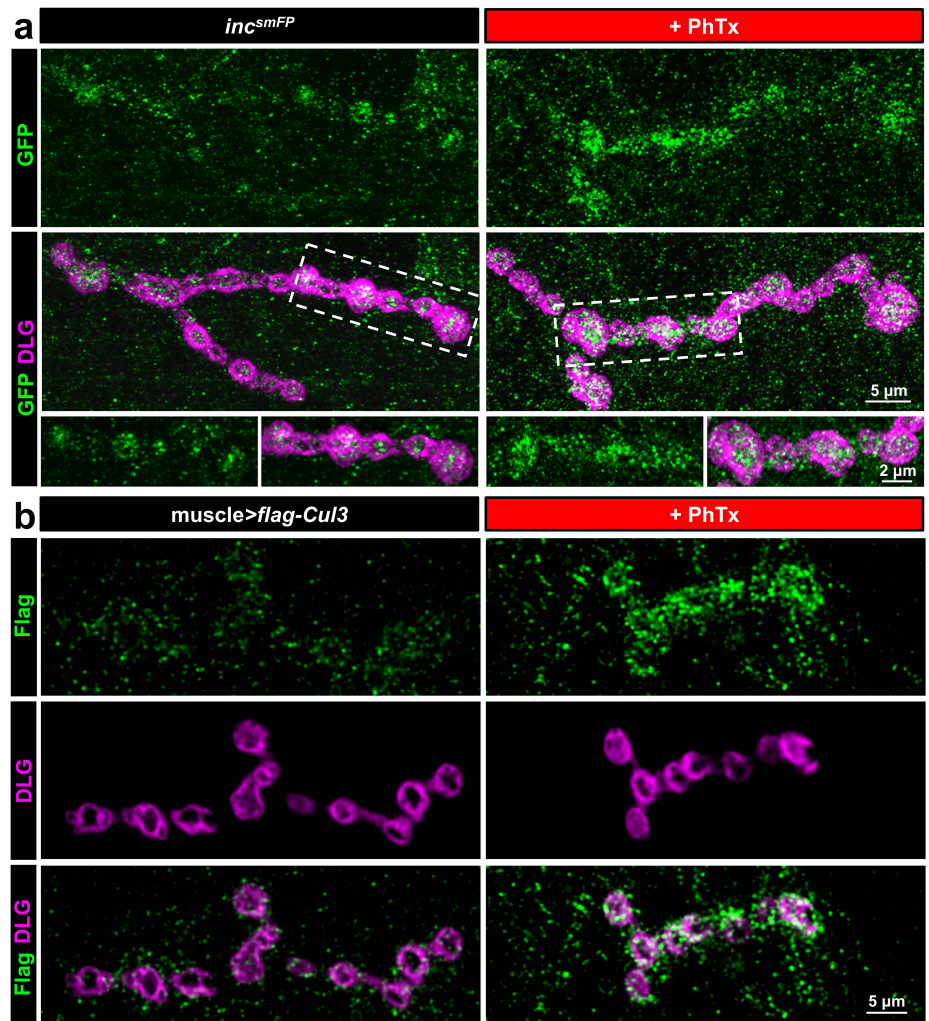



**Supplementary Figure 4: Inc<sup>smFP</sup> and Flag-Cul3 rapidly accumulate at the NMJ following PhTx application.** Representative images of the muscle 6 NMJ in *inc<sup>smFP</sup>* larvae **(a)** and *flag-Cul3* expressed in the postsynaptic muscle (*G14-Gal4/UAS-3xHA-3xflag-Cul3*) **(b)** at baseline and after 10 min incubation in PhTx. NMJs are immunostained with anti-GFP or anti-Flag and anti-DLG.

**Supplementary Table 1: List of Inc- and Cul3-interacting genes screened and summarized results.** The gene identity, name, putative function, genotype, genetic perturbation, source, and mEPSP, EPSP, and quantal content values are shown for each gene screened. The reference indicates the source that reported an interaction between Inc or Cul3 or their mammalian homologs.

| Inc- interacting genes  |                                                      |            |                                                                                      |                            |                                          |                   |      |       |      |       |    |                                    |
|-------------------------|------------------------------------------------------|------------|--------------------------------------------------------------------------------------|----------------------------|------------------------------------------|-------------------|------|-------|------|-------|----|------------------------------------|
| CG #                    | Gene                                                 | Abb.       | Putative function                                                                    | Allele                     | Disruption Type                          | Source            | PhTx | mEPSP | EPSP | QC    | n  | Ref.                               |
|                         |                                                      |            | w1118                                                                                |                            |                                          |                   | +    | 0.6   | 33   | 63.9  | 7  |                                    |
|                         |                                                      |            |                                                                                      |                            |                                          |                   | -    | 1.1   | 35   | 32.4  | 12 |                                    |
| 9025                    | Fem-1                                                | Fem-1      | regulate Stem-Loop Binding Protein (SLBP) translation and degradation                | Fem-1 <sup>EP2065</sup>    | transposon insertion in 5' UTR           | BL17232           | +    | 0.6   | 32   | 53.9  | 7  | Giot et al., 2003 <sup>2</sup>     |
|                         |                                                      |            |                                                                                      |                            |                                          |                   | -    | 1.1   | 28   | 27.6  | 8  |                                    |
| 7001                    | S6 Kinase Like                                       | S6KL       | inhibits BMP signaling, neuromuscular junction growth and synaptic endocytosis       | S6KL <sup>EY026723</sup>   | transposon insertion in 5' UTR           | BL16752           | +    | 0.6   | 29   | 50.0  | 8  | Giot et al., 2003 <sup>2</sup>     |
|                         |                                                      |            |                                                                                      |                            |                                          |                   | -    | 1.1   | 30   | 30.2  | 8  |                                    |
| 3937                    | cheerio                                              | cher       | neuronal growth cones, dimeric F-actin crosslinking protein                          | cher <sup>M07480</sup>     | transposon insertion in intron           | BL43714           | +    | 0.6   | 30   | 51.1  | 5  | Giot et al., 2003 <sup>2</sup>     |
|                         |                                                      |            |                                                                                      |                            |                                          |                   | -    | 1.0   | 33   | 35.7  | 6  |                                    |
| 8593                    | quemao                                               | qm         | catalyses protein prenylation and facilitates membrane targeting of proteins         | qm <sup>2</sup>            | transposon insertion in 3' UTR           | BL25827           | +    | 0.5   | 19   | 34.2  | 7  | Giot et al., 2003 <sup>2</sup>     |
|                         |                                                      |            |                                                                                      |                            |                                          |                   | -    | 1.1   | 23   | 22.4  | 7  |                                    |
| 7809                    | Grasp65                                              | Grasp65    | myristoylated Golgi protein, mediate the Golgi bypass of transmembrane proteins      | Grasp <sup>302</sup>       | transposon insertion in 5' UTR           | Zhou et al., 2014 | +    | 0.6   | 32   | 57.7  | 12 | Giot et al., 2003 <sup>2</sup>     |
|                         |                                                      |            |                                                                                      |                            |                                          |                   | -    | 1.3   | 31   | 26.2  | 14 |                                    |
| 7809                    | Grasp65                                              | Grasp65    | myristoylated Golgi protein, mediate the Golgi bypass of transmembrane proteins      | Grasp <sup>129</sup>       | transposon insertion in 5' UTR           | Zhou et al., 2014 | +    | 0.6   | 29   | 53.4  | 14 | Giot et al., 2003 <sup>2</sup>     |
|                         |                                                      |            |                                                                                      |                            |                                          |                   | -    | 1.2   | 38   | 37.5  | 8  |                                    |
| 6606                    | Rab11 interacting protein                            | Rip11      | binds to GTP bound form of Rab11, regulates Rhodopsin transport and cytokinesis      | Rip11 <sup>KG02485/+</sup> | transposon insertion in 5' UTR           | BL13742           | +    | 0.5   | 30   | 62.5  | 4  | Giot et al., 2003 <sup>2</sup>     |
|                         |                                                      |            |                                                                                      |                            |                                          |                   | -    | 0.7   | 34   | 51.2  | 5  |                                    |
| 4593                    | Sex lethal                                           | Sxl        | RNA-binding, switch sexual dimorphism                                                | Sxl <sup>l2</sup>          | spontaneous                              | BL54593           | +    | 0.7   | 32   | 40.6  | 4  | Giot et al., 2003 <sup>2</sup>     |
|                         |                                                      |            |                                                                                      |                            |                                          |                   | -    | 1.2   | 33   | 28.2  | 4  |                                    |
| 3018                    | lesswright                                           | lwr        | innate immunity, meiosis, and anterior patterning of the embryo                      | lwr <sup>05486/+</sup>     | transposon insertion in exon             | BL11410           | +    | 0.5   | 33   | 73.4  | 2  | Giot et al., 2003 <sup>2</sup>     |
|                         |                                                      |            |                                                                                      |                            |                                          |                   | -    | 0.9   | 35   | 40.1  | 3  |                                    |
| 14899                   | Derlin-2                                             | Der-2      | regulate ER degradation                                                              | Der-2 <sup>HP30303</sup>   | transposon insertion in 5' UTR           | BL22205           | +    | 0.6   | 35   | 54.5  | 5  | Hein et al., 2015 <sup>3</sup>     |
|                         |                                                      |            |                                                                                      |                            |                                          |                   | -    | 1.1   | 37   | 32.6  | 8  |                                    |
| 32654                   | Secretory 16                                         | Sec16      | organize endoplasmic reticulum exit sites, stress response                           | Sec16 <sup>A</sup>         | ethyl methanesulfonate                   | BL52390           | +    | 0.7   | 36   | 49.7  | 11 | Hein et al., 2015 <sup>3</sup>     |
|                         |                                                      |            |                                                                                      |                            |                                          |                   | -    | 1.0   | 36   | 38.2  | 7  |                                    |
| 11642                   | TRAM                                                 | TRAM       | pain sensitive, immune responses                                                     | TRAM <sup>KG01407</sup>    | transposon insertion in 5' UTR           | BL13435           | +    | 0.5   | 30   | 60.2  | 4  | Hein et al., 2015 <sup>3</sup>     |
|                         |                                                      |            |                                                                                      |                            |                                          |                   | -    | 1.5   | 37   | 24.4  | 4  |                                    |
| 8783                    | Cdc42                                                | Cdc42      | GTPase signaling protein, regulate actin cytoskeleton                                | Cdc42 <sup>1</sup>         | ethyl methanesulfonate                   | BL8783            | +    | 0.4   | 41   | 101.1 | 2  | Hein et al., 2015 <sup>3</sup>     |
|                         |                                                      |            |                                                                                      |                            |                                          |                   | -    | 1.0   | 42   | 38.0  | 4  |                                    |
| CG #                    | Gene                                                 | Abb.       | Putative function                                                                    | RNAi                       | Genotype                                 | Source            | PhTx | mEPSP | EPSP | QC    | n  | Ref.                               |
| 7937                    | C15                                                  | C15        | Unknown                                                                              | TRIP 20                    | G14-Gal4X<br>TRIP.HMS01431               | BL35018           | +    | 0.7   | 34   | 52.3  | 7  | Giot et al., 2003 <sup>2</sup>     |
|                         |                                                      |            |                                                                                      |                            |                                          |                   | -    | 1.4   | 39   | 27.9  | 2  |                                    |
| 6223                    | Coat Protein (coatomer) β                            | βCOP       | retrograde transport of vesicles from the golgi to the endoplasmic reticulum         | TRIP 20                    | G14-Gal4X<br>TRIP.HMS01079               | BL33741           | +    | 0.6   | 31   | 52.4  | 8  | Hein et al., 2015 <sup>3</sup>     |
|                         |                                                      |            |                                                                                      |                            |                                          |                   | -    | 0.9   | 32   | 34.7  | 8  |                                    |
| 16728                   | G protein-coupled receptor kinase interacting ArfGAP | Git        | muscle morphogenesis, synaptic vesicle recycling                                     | TRIP 10                    | G14-Gal4X<br>TRIP.JF01156                | BL31583           | +    | 0.5   | 30   | 60.1  | 6  | Wang et al., 2011 <sup>7</sup>     |
|                         |                                                      |            |                                                                                      |                            |                                          |                   | -    | 0.9   | 37   | 41.9  | 6  |                                    |
| 33052                   | Golgin, RAB6 interacting                             | Gorab      | locomotion, cell cycle, spermatogenesis                                              | TRIP 20                    | G14-Gal4X<br>TRIP.HMC03748               | BL55610           | +    | 0.7   | 36   | 55.3  | 7  | Hein et al., 2015 <sup>3</sup>     |
|                         |                                                      |            |                                                                                      |                            |                                          |                   | -    | 1.2   | 35   | 32.1  | 7  |                                    |
| 7359                    | Secretory 22                                         | Sec22      | regulate Golgi apparatus, ER                                                         | TRIP 20                    | G14-Gal4X<br>TRIP.HMS01238               | BL34893           | +    | 0.4   | 30   | 80.2  | 4  | Hein et al., 2015 <sup>3</sup>     |
|                         |                                                      |            |                                                                                      |                            |                                          |                   | -    | 0.8   | 30   | 39.5  | 3  |                                    |
| 9206                    | Dynactin 1, p150 subunit                             | DCTN1-p150 | modulates binding of dynein to cellular cargoes, neuronal transport and neurogenesis | dominant negative          | G14-Gal4X<br>UAS-DCTN1-p150 <sup>A</sup> | BL51645           | +    | 0.5   | 32   | 63.3  | 3  | Hein et al., 2015 <sup>3</sup>     |
|                         |                                                      |            |                                                                                      |                            |                                          |                   | -    | 1.0   | 34   | 35.2  | 6  |                                    |
| 5000                    | mini spindles                                        | msps       | microtubule dynamic, oogenesis                                                       | TRIP 10                    | G14-Gal4X<br>TRIP.JF01613                | BL31138           | +    | 0.6   | 43   | 77.9  | 4  | Hutchins et al., 2010 <sup>5</sup> |
|                         |                                                      |            |                                                                                      |                            |                                          |                   | -    | 1.1   | 40   | 37.5  | 4  |                                    |
| Cul3- interaction genes |                                                      |            |                                                                                      |                            |                                          |                   |      |       |      |       |    |                                    |
| CG #                    | Gene                                                 | Abb.       | Putative function                                                                    | Allele                     | Disruption Type                          | Source            | PhTx | mEPSP | EPSP | QC    | n  | Ref.                               |
| 9148                    | supercoiling factor                                  | scf        | endoplasmic reticulum-resident protein                                               | scf <sup>EY01124</sup>     | transposon insertion in 5' UTR           | BL15325           | +    | 0.5   | 28   | 54.3  | 8  | Bennett et al., 2010 <sup>1</sup>  |
|                         |                                                      |            |                                                                                      |                            |                                          |                   | -    | 1.0   | 29   | 28.2  | 20 |                                    |
| 17765                   | peflin                                               | PEF1       | ER-to-Golgi transport, calcium-dependent adaptor, collagen export                    | CG17765 <sup>C295</sup>    | transposon insertion in intron           | BL16330           | +    | 0.6   | 12   | 22.3  | 15 | McGourty et al., 2016 <sup>6</sup> |
|                         |                                                      |            |                                                                                      |                            |                                          |                   | -    | 1.1   | 32   | 29.8  | 15 |                                    |
| 7210                    | kelch                                                | kel        | ubiquitin-proteasome pathway                                                         | kel <sup>DE1</sup>         | ethyl methanesulfonate                   | BL4893            | +    | 0.6   | 35   | 60.0  | 10 | Hudson et al., 2015 <sup>4</sup>   |
|                         |                                                      |            |                                                                                      |                            |                                          |                   | -    | 1.1   | 34   | 31.4  | 6  |                                    |
| 1250                    | Secretory 23                                         | Sec23      | Golgi, ER membrane transport regulation                                              | Sec23 <sup>EY06757</sup>   | transposon insertion in 5' UTR           | BL15325           | +    | 0.4   | 23   | 52.1  | 3  | McGourty et al., 2016 <sup>5</sup> |
|                         |                                                      |            |                                                                                      |                            |                                          |                   | -    | 1.2   | 32   | 30.0  | 3  |                                    |
| CG #                    | Gene                                                 | Abb.       | Putative function                                                                    | RNAi                       | Genotype                                 | Source            | PhTx | mEPSP | EPSP | QC    | n  | Ref.                               |
| 7210                    | kelch                                                | kel        | ubiquitin-proteasome pathway                                                         | TRIP 10                    | G14-Gal4X                                | BL31251           | +    | 0.5   | 34   | 65.0  | 8  | Hudson et al., 2015 <sup>4</sup>   |
|                         |                                                      |            |                                                                                      |                            |                                          |                   | -    | 1.1   | 33   | 33.4  | 8  |                                    |
| 9148                    | supercoiling factor                                  | scf        | endoplasmic reticulum-resident protein                                               | TRIP 20                    | G14-Gal4X                                | BL34331           | +    | 0.6   | 28   | 48.9  | 6  | Giot et al., 2003 <sup>2</sup>     |
|                         |                                                      |            |                                                                                      |                            |                                          |                   | -    | 0.9   | 32   | 40.1  | 3  |                                    |
| 17765                   | peflin                                               | PEF1       | ER-to-Golgi transport, calcium-dependent adaptor, collagen export                    | insertion                  | G14-Gal4X<br>GD8610                      | v32404            | +    | 0.5   | 15   | 30.2  | 8  | McGourty et al., 2016 <sup>6</sup> |
|                         |                                                      |            |                                                                                      |                            |                                          |                   | -    | 1.1   | 35   | 32.4  | 12 |                                    |

**Supplementary Table 2: Absolute values for normalized data and additional statistical details.** The figure and panel, genotype, and conditions are noted. Average values (with standard error values noted in parentheses) are shown for all data. For electrophysiological experiments, passive membrane properties (input resistance, leak current), mEPSC, EPSC, quantal content (QC), data samples (n), and statistical significance tests and values are shown.

| Figure                                                                                   | Label                       | Genotype                                                     | PhTx | mEPSC amplitude (nA) | EPSC amplitude (nA) | QC               | mEPSC frequency (Hz) | Input resistance (MΩ) | Leak current (nA) | n  | P Value (significance: mEPSC amp, EPSC, QC, mEPSC freq)   |
|------------------------------------------------------------------------------------------|-----------------------------|--------------------------------------------------------------|------|----------------------|---------------------|------------------|----------------------|-----------------------|-------------------|----|-----------------------------------------------------------|
| 2c,d                                                                                     | wild type                   | <i>w<sup>1118</sup></i>                                      | -    | 0.416 (0.010)        | 47.539 (6.205)      | 116.894 (15.715) | 2.538 (0.297)        | 19.000 (2.154)        | 4.403 (0.483)     | 17 | -                                                         |
| 2c,d                                                                                     | wild type                   | <i>w<sup>1118</sup></i>                                      | +    | 0.190 (0.014)        | 40.084 (6.864)      | 209.751 (30.411) | 1.818 (0.100)        | 11.364 (0.877)        | 4.982 (0.669)     | 11 | <0.0001 (****), 0.4359 (ns), 0.0062 (**), 0.0699 (ns)     |
| 2c,d                                                                                     | <i>inc<sup>kk3</sup></i>    | <i>inc<sup>kk3</sup></i>                                     | -    | 0.377 (0.019)        | 40.591 (3.403)      | 109.991 (10.179) | 1.765 (0.216)        | 14.188 (2.801)        | 3.930 (0.532)     | 16 | -                                                         |
| 2c,d                                                                                     | <i>inc<sup>kk3</sup></i>    | <i>inc<sup>kk3</sup></i>                                     | +    | 0.203 (0.014)        | 26.661 (4.994)      | 128.007 (20.924) | 0.876 (0.159)        | 23.700 (3.113)        | 1.506 (0.290)     | 10 | <0.0001 (****), 0.0251 (*), 0.3963 (ns), 0.0072 (**)      |
| 2d                                                                                       | <i>inc<sup>kk3/Df</sup></i> | <i>inc<sup>kk3/incDf</sup></i>                               | -    | 0.327 (0.009)        | 42.173 (6.412)      | 129.429 (20.323) | 1.750 (0.159)        | 6.900 (1.140)         | 1.236 (0.319)     | 10 | -                                                         |
| 2d                                                                                       | <i>inc<sup>kk3/Df</sup></i> | <i>inc<sup>kk3/incDf</sup></i>                               | +    | 0.143 (0.007)        | 13.508 (2.437)      | 98.420 (21.895)  | 0.478 (0.064)        | 5.375 (0.263)         | 3.603 (0.415)     | 8  | <0.0001 (****), 0.0016 (**), 0.3167 (ns), <0.0001 (****)  |
| 2d                                                                                       | <i>inc<sup>kk4</sup></i>    | <i>inc<sup>kk4</sup></i>                                     | -    | 0.475 (0.013)        | 47.175 (4.913)      | 99.888 (10.597)  | 1.033 (0.119)        | 6.929 (0.529)         | 2.165 (0.263)     | 14 | -                                                         |
| 2d                                                                                       | <i>inc<sup>kk4</sup></i>    | <i>inc<sup>kk4</sup></i>                                     | +    | 0.194 (0.009)        | 20.077 (2.272)      | 108.39 (14.284)  | 1.689 (0.223)        | 5.857 (0.275)         | 3.148 (0.264)     | 14 | <0.0001 (****), <0.0001 (****), 0.6366 (ns), <0.0153 (*)  |
| 2g                                                                                       | wild type                   | <i>w<sup>1118</sup></i>                                      | -    | 0.439 (0.015)        | 42.118 (5.837)      | 98.757 (15.023)  | 2.372 (0.412)        | 9.300 (1.777)         | 3.730 (0.650)     | 10 | -                                                         |
| 2g                                                                                       | wild type                   | <i>w<sup>1118</sup></i>                                      | +    | 0.207 (0.014)        | 37.289 (3.304)      | 180.545 (11.241) | 1.421 (0.311)        | 10.444 (1.590)        | 3.139 (0.683)     | 9  | <0.0001 (****), 0.4992 (ns), 0.0006 (***), 0.0022 (*)     |
| 2f,g                                                                                     | presynaptic rescue          | <i>inc<sup>kk3</sup>; OK371-Gal4/ UAS-smFP-Inc</i>           | -    | 0.342 (0.021)        | 41.817 (2.837)      | 130.907 (13.521) | 2.063 (0.279)        | 7.125 (0.730)         | 2.321 (0.486)     | 16 | -                                                         |
| 2f,g                                                                                     | presynaptic rescue          | <i>inc<sup>kk3</sup>; OK371-Gal4/UAS-smFP-Inc</i>            | +    | 0.163 (0.011)        | 22.532 (2.420)      | 148.699 (18.871) | 0.884 (0.129)        | 5.714 (0.450)         | 3.051 (0.211)     | 14 | <0.0001 (****), <0.0001 (****), 0.4418 (ns), <0.0010 (**) |
| 2f,g                                                                                     | postsynaptic rescue         | <i>inc<sup>kk3</sup>; UAS-smFP-Inc/+; MHC-Gal4/+</i>         | -    | 0.321 (0.023)        | 46.367 (6.799)      | 149.643 (34.958) | 3.410 (0.112)        | 5.750 (0.305)         | 2.188 (0.238)     | 12 | -                                                         |
| 2f,g                                                                                     | postsynaptic rescue         | <i>inc<sup>kk3</sup>; UAS-smFP-Inc/+; MHC-Gal4/+</i>         | +    | 0.178 (0.010)        | 42.524 (4.441)      | 249.018 (29.998) | 1.669 (0.291)        | 5.833 (0.405)         | 3.342 (0.306)     | 10 | <0.0001 (****), 0.5096 (ns), 0.0071 (**), 0.0137 (*)      |
| QC % baseline significance: postsynaptic rescue +PhTx v.s. wild type + PhTx: 0.8811 (ns) |                             |                                                              |      |                      |                     |                  |                      |                       |                   |    |                                                           |
| 3a,b                                                                                     | pre>Cul3 RNAi               | <i>OK371-Gal4/UAS-Cul3 RNAi<sup>11861R</sup>; UAS-Dcr2/+</i> | -    | 0.342 (0.015)        | 36.546 (3.014)      | 107.969 (9.333)  | 2.363 (0.303)        | 7.500 (0.732)         | 1.275 (0.434)     | 8  | -                                                         |
| 3a,b                                                                                     | pre>Cul3 RNAi               | <i>OK371-Gal4/UAS-Cul3 RNAi<sup>11861R</sup>; UAS-Dcr2/+</i> | +    | 0.176 (0.012)        | 29.324 (2.873)      | 165.346 (7.621)  | 1.144 (0.164)        | 8.000 (0.906)         | 2.210 (0.325)     | 8  | <0.0001 (****), 0.1048 (ns), 0.0003 (***), 0.0033 (**)    |
| 3a,b                                                                                     | post> Cul3 RNAi             | <i>UAS-Cul3 RNAi<sup>11861R/+</sup>; MHC-Gal4/UAS-Dcr2</i>   | -    | 0.362 (0.012)        | 44.023 (4.485)      | 127.653 (16.999) | 3.603 (0.696)        | 6.231 (0.257)         | 2.082 (0.361)     | 13 | -                                                         |

|      |                                                               |                                                               |   |               |                |                  |               |               |               |    |                                                              |
|------|---------------------------------------------------------------|---------------------------------------------------------------|---|---------------|----------------|------------------|---------------|---------------|---------------|----|--------------------------------------------------------------|
| 3a,b | post> Cul3 RNAi                                               | UAS-Cul3RNAi <sup>11861R/+</sup> ; MHC-Gal4/UAS-Dcr2          | + | 0.206 (0.012) | 23.343 (2.183) | 119.502 (13.153) | 1.557 (0.153) | 6.500 (0.294) | 2.764 (0.373) | 18 | <0.0001 (****), 0.0001 (***), 0.7029 (ns), 0.0024 (**)       |
| 3c,d | <i>inc<sup>kk3</sup>/+</i>                                    | <i>inc<sup>kk3</sup>/+</i>                                    | - | 0.389 (0.009) | 47.674 (3.309) | 124.351 (10.291) | 2.908 (0.365) | 8.182 (0.519) | 2.160 (0.288) | 11 | -                                                            |
| 3c,d | <i>inc<sup>kk3</sup>/+</i>                                    | <i>inc<sup>kk3</sup>/+</i>                                    | + | 0.208 (0.011) | 48.392 (4.610) | 235.243 (20.197) | 1.783 (0.318) | 7.909 (0.653) | 2.734 (0.232) | 11 | <0.0001 (****), 0.9006 (ns), <0.0001 (****), 0.0309 (*)      |
| 3c,d | <i>Cul3<sup>EY11031</sup>/+</i>                               | <i>Cul3<sup>EY11031</sup>/+</i>                               | - | 0.346 (0.015) | 30.569 (2.645) | 88.891 (7.429)   | 2.629 (0.654) | 7.000 (0.732) | 2.109 (0.488) | 8  | -                                                            |
| 3c,d | <i>Cul3<sup>EY11031</sup>/+</i>                               | <i>Cul3<sup>EY11031</sup>/+</i>                               | + | 0.182 (0.019) | 26.283 (2.029) | 158.581 (21.750) | 1.288 (0.321) | 6.875 (0.673) | 2.896 (0.689) | 8  | <0.0001 (****), 0.2194 (ns), 0.0090 (**), 0.0868 (*)         |
| 3c,d | <i>inc<sup>kk3</sup>/+</i> ; <i>Cul3<sup>EY11031</sup>/+</i>  | <i>inc<sup>kk3</sup>/+</i> ; <i>Cul3<sup>EY11031</sup>/+</i>  | - | 0.350 (0.015) | 51.326 (3.331) | 150.141 (12.620) | 2.041 (0.141) | 6.545 (0.493) | 3.074 (0.761) | 11 | -                                                            |
| 3c,d | <i>inc<sup>kk3</sup>/+</i> ; <i>Cul3<sup>EY11031</sup>/+</i>  | <i>inc<sup>kk3</sup>/+</i> ; <i>Cul3<sup>EY11031</sup>/+</i>  | + | 0.181 (0.016) | 22.134 (2.622) | 140.291 (30.912) | 1.522 (0.146) | 5.571 (0.291) | 3.199 (0.184) | 14 | <0.0001 (****), <0.0001 (****), 0.7911 (*), 0.0199 (*)       |
| 6d,e | wild type                                                     | <i>w<sup>1118</sup></i>                                       | - | 0.447 (0.012) | 47.565 (2.473) | 108.186 (7.942)  | 2.746 (0.165) | 7.417 (0.557) | 2.461 (0.314) | 8  | -                                                            |
| 6d,e | wild type                                                     | <i>w<sup>1118</sup></i>                                       | + | 0.249 (0.004) | 44.050 (2.002) | 176.555 (7.064)  | 1.492 (0.210) | 6.714 (0.484) | 2.978 (0.402) | 7  | <0.0001 (****), 0.1773 (ns), 0.0005 (***), 0.0008 (***)      |
| 6d,e | <i>pef<sup>C295</sup></i>                                     | <i>pef<sup>C295</sup></i>                                     | - | 0.439 (0.006) | 41.957 (7.354) | 96.183 (17.799)  | 3.709 (0.731) | 5.571 (0.686) | 1.391 (0.226) | 7  | -                                                            |
| 6d,e | <i>pef<sup>C295</sup></i>                                     | <i>pef<sup>C295</sup></i>                                     | + | 0.261 (0.004) | 17.920 (2.936) | 68.404 (10.666)  | 2.106 (0.222) | 6.750 (0.407) | 1.515 (0.113) | 8  | <0.0001 (****), 0.0041 (**), 0.2896 (ns), 0.1240 (ns)        |
| 6d,e | <i>muscle&gt;Pef RNAi</i>                                     | <i>G14-Gal4/UAS-Pef RNAi</i>                                  | - | 0.399 (0.011) | 34.753 (2.457) | 89.116 (8.176)   | 2.342 (0.233) | 7.154 (0.406) | 3.817 (0.500) | 10 | -                                                            |
| 6d,e | <i>muscle&gt;Pef RNAi</i>                                     | <i>G14-Gal4/UAS-Pef RNAi</i>                                  | + | 0.202 (0.007) | 12.856 (1.610) | 63.940 (8.205)   | 0.760 (0.065) | 6.000 (0.677) | 3.904 (0.292) | 9  | <0.0001 (****), <0.0001 (****), 0.09602 (ns), <0.0001 (****) |
| 6f,g | <i>pef<sup>C295</sup>/+</i>                                   | <i>pef<sup>C295</sup>/+</i>                                   | - | 0.435 (0.011) | 44.373 (0.932) | 102.338 (3.180)  | 2.684 (0.231) | 7.000 (0.559) | 1.846 (0.234) | 8  | -                                                            |
| 6f,g | <i>pef<sup>C295</sup>/+</i>                                   | <i>pef<sup>C295</sup>/+</i>                                   | + | 0.230 (0.007) | 44.771 (3.859) | 192.562 (12.384) | 1.126 (0.073) | 6.625 (0.323) | 2.688 (0.284) | 8  | <0.0001 (****), 0.9156 (ns), <0.0001 (****), 0.0312 (*)      |
| 6f,g | <i>Cul3<sup>EY11031</sup>/+</i>                               | <i>Cul3<sup>EY11031</sup>/+</i>                               | - | 0.436 (0.023) | 35.969 (4.768) | 80.761 (7.756)   | 2.578 (0.678) | 8.750 (0.861) | 2.673 (0.465) | 8  | -                                                            |
| 6f,g | <i>Cul3<sup>EY11031</sup>/+</i>                               | <i>Cul3<sup>EY11031</sup>/+</i>                               | + | 0.260 (0.012) | 38.819 (2.648) | 149.363 (8.392)  | 1.183 (0.065) | 6.000 (0.436) | 2.773 (0.289) | 7  | <0.0001 (****), 0.6245 (ns), <0.0001 (****), 0.0784 (ns)     |
| 6f,g | <i>Cul3<sup>EY11031</sup>/+</i> , <i>pef<sup>C295</sup>/+</i> | <i>Cul3<sup>EY11031</sup>/+</i> , <i>pef<sup>C295</sup>/+</i> | - | 0.440 (0.015) | 35.924 (1.752) | 83.821 (4.780)   | 2.005 (0.167) | 7.000 (0.281) | 2.347 (0.319) | 21 | -                                                            |
| 6f,g | <i>Cul3<sup>EY11031</sup>/+</i> , <i>pef<sup>C295</sup>/+</i> | <i>Cul3<sup>EY11031</sup>/+</i> , <i>pef<sup>C295</sup>/+</i> | + | 0.239 (0.009) | 20.925 (2.825) | 85.701 (9.919)   | 1.574 (0.567) | 6.750 (0.579) | 2.503 (0.195) | 11 | <0.0001 (****), <0.0001 (****), 0.854 (ns), 0.383 (ns)       |
| 6h,i | <i>inc<sup>kk3</sup>/+</i>                                    | <i>inc<sup>kk3</sup>/+</i>                                    | - | 0.391 (0.010) | 47.143 (4.321) | 122.094 (13.060) | 2.645 (0.373) | 8.375 (0.653) | 2.135 (0.385) | 8  | -                                                            |
| 6h,i | <i>inc<sup>kk3</sup>/+</i>                                    | <i>inc<sup>kk3</sup>/+</i>                                    | + | 0.207 (0.014) | 46.001 (5.278) | 225.273 (24.012) | 1.893 (0.398) | 7.889 (0.837) | 2.821 (0.273) | 8  | <0.0001 (****), 0.1007 (ns), 0.0011 (**), 0.1007 (ns)        |

|              |                                                          |                                                                       |   |                  |                    |                     |                  |                   |                  |    |                                                                   |
|--------------|----------------------------------------------------------|-----------------------------------------------------------------------|---|------------------|--------------------|---------------------|------------------|-------------------|------------------|----|-------------------------------------------------------------------|
| 6h,i         | <i>dmp<sup>253/+</sup></i>                               | <i>dmp<sup>253/+</sup></i>                                            | - | 0.457<br>(0.013) | 41.966<br>(2.637)  | 89.099<br>(6.356)   | 1.844<br>(0.191) | 8.938<br>(1.206)  | 1.218<br>(0.116) | 8  | -                                                                 |
| 6h,i         | <i>dmp<sup>253/+</sup></i>                               | <i>dmp<sup>253/+</sup></i>                                            | + | 0.206<br>(0.008) | 35.423<br>(2.265)  | 173.986<br>(10.497) | 0.877<br>(0.067) | 8.222<br>(0.440)  | 1.527<br>(0.605) | 14 | <0.0001 (****),<br>0.1183 (ns),<br>0.0001 (***),<br>0.0003 (**)   |
| 6h,i         | <i>inc<sup>kk3/+</sup>;<br/>dmp<sup>253/+</sup></i>      | <i>inc<sup>kk3/+</sup>;<br/>dmp<sup>253/+</sup></i>                   | - | 0.368<br>(0.011) | 32.367<br>(2.285)  | 87.627<br>(4.685)   | 1.688<br>(0.209) | 5.778<br>(0.324)  | 1.510<br>(0.378) | 9  | -                                                                 |
| 6h,i         | <i>inc<sup>kk3/+</sup>;<br/>dmp<sup>253/+</sup></i>      | <i>inc<sup>kk3/+</sup>;<br/>dmp<sup>253/+</sup></i>                   | + | 0.180<br>(0.007) | 16.738<br>(1.691)  | 94.482<br>(11.231)  | 0.836<br>(0.069) | 6.111<br>(0.389)  | 1.177<br>(0.385) | 9  | <0.0001 (****),<br>0.0035 (**),<br>0.686 (ns),<br>0.0202 (*)      |
| 6h,i         | <i>Cul3<sup>EY11031/+</sup>;<br/>dmp<sup>253/+</sup></i> | <i>Cul3<sup>EY11031/+</sup>;<br/>dmp<sup>253/+</sup></i>              | - | 0.420<br>(0.014) | 30.724<br>(1.426)  | 73.423<br>(2.824)   | 1.527<br>(0.145) | 5.667<br>(0.303)  | 1.453<br>(0.358) | 10 | -                                                                 |
| 6h,i         | <i>Cul3<sup>EY11031/+</sup>;<br/>dmp<sup>253/+</sup></i> | <i>Cul3<sup>EY11031/+</sup>;<br/>dmp<sup>253/+</sup></i>              | + | 0.232<br>(0.010) | 11.697<br>(1.364)  | 50.456<br>(5.379)   | 0.584<br>(0.087) | 7.462<br>(0.584)  | 1.748<br>(0.385) | 11 | <0.0001 (****),<br><0.0001 (****),<br>0.0038 (**),<br>0.0001 (**) |
| S1b-f        | wild type                                                | w1118                                                                 | - | 0.416<br>(0.011) | 47.539<br>(6.205)  | 116.894<br>(15.715) | 2.538<br>(0.297) | 9.000<br>(2.154)  | 4.403<br>(0.483) | 17 | -                                                                 |
| S1b-f        | <i>inckk3</i>                                            | <i>inckk3</i>                                                         | - | 0.377<br>(0.019) | 40.591<br>(3.403)  | 109.991<br>(10.179) | 1.765<br>(0.216) | 14.188<br>(2.801) | 3.930<br>(0.532) | 16 | 0.0797 (ns),<br>0.3422 (ns),<br>0.7185 (ns),<br>0.0460 (ns)       |
| S1b-f        | <i>inc2</i>                                              | <i>inc2</i>                                                           | - | 0.416<br>(0.013) | 42.522<br>(4.934)  | 101.760<br>(11.103) | 0.814<br>(0.198) | 10.143<br>(0.705) | 3.516<br>(0.389) | 7  | 0.9848 (ns),<br>0.6299 (ns),<br>0.5628 (ns),<br>0.0018 (**)       |
| S1b-f        | <i>inc2/Df</i>                                           | <i>inc2/incDf</i>                                                     | - | 0.394<br>(0.012) | 41.214<br>(5.634)  | 103.545<br>(13.177) | 1.599<br>(0.270) | 6.667<br>(0.376)  | 2.796<br>(0.450) | 12 | 0.1840 (ns),<br>0.4778 (ns),<br>0.5451 (ns),<br>0.0474 (ns)       |
| S1b-f        | <i>inc2/1</i>                                            | <i>inc2/inc1</i>                                                      | - | 0.365<br>(0.009) | 25.988<br>(2.730)  | 72.830<br>(8.496)   | 0.987<br>(0.167) | 8.286<br>(0.997)  | 3.534<br>(0.635) | 14 | 0.0015 (**),<br>0.0061 (**),<br>0.0276 (*),<br>0.0002 (***)       |
| S2c,d        | -                                                        | w <sup>1118</sup>                                                     | - | 0.416<br>(0.010) | 47.539<br>(6.205)  | 116.894<br>(15.715) | 2.538<br>(0.297) | 19.000<br>(2.154) | 4.403<br>(0.483) | 17 | -                                                                 |
| S2c,d        | <i>GluRIIA</i>                                           | <i>GluRIIA<sup>SP16</sup></i>                                         | - | 0.175<br>(0.009) | 33.330<br>(2.351)  | 193.522<br>(11.376) | 0.758<br>(0.231) | 11.700<br>(0.684) | 3.712<br>(0.250) | 10 | <0.0001 (****),<br>0.1084 (ns),<br>0.0037 (**),<br>0.0007 (***)   |
| S2c,d        | <i>inc<sup>kk3</sup>;<br/>GluRIIA</i>                    | <i>inc<sup>kk3</sup>;<br/>GluRIIA<sup>SP16</sup></i>                  | + | 0.202<br>(0.011) | 20.0129<br>(3.003) | 106.939<br>(19.961) | 0.923<br>(0.547) | 4.700<br>(0.456)  | 3.530<br>(0.471) | 10 | <0.0001 (****),<br>0.0038 (**),<br>0.7225 (ns),<br>0.0183 (*)     |
| S2c,d        | <i>inc<sup>kk3/Df</sup>;<br/>GluRIIA</i>                 | <i>inc<sup>kk3</sup>/inc<sup>Df</sup>;<br/>GluRIIA<sup>SP16</sup></i> | + | 0.180<br>(0.007) | 21.987<br>(2.984)  | 118.852<br>(13.807) | 1.610<br>(0.359) | 6.000<br>(0.365)  | 2.028<br>(0.393) | 15 | <0.0001 (****),<br>0.0013 (**),<br>0.9269 (ns),<br>0.0540 (ns)    |
| S3a-d        | wild type                                                | w <sup>1118</sup>                                                     | - | 0.419<br>(0.010) | 47.656<br>(5.194)  | 114.300<br>(12.286) | 2.869<br>(0.335) | 8.125<br>(0.706)  | 2.686<br>(0.312) | 16 | -                                                                 |
| S3a-d        | neuronal ><br><i>smFP-inc</i>                            | OK371-<br><i>Gal4/UAS-smFP-<br/>inc</i>                               | - | 0.387<br>(0.007) | 44.644<br>(4.622)  | 116.406<br>(12.768) | 1.633<br>(0.275) | 5.666<br>(0.337)  | 1.917<br>(0.546) | 9  | 0.0377 (ns),<br>0.7080 (ns),<br>0.9151 (ns),<br>0.0222 (*)        |
| not<br>shown | neuronal ><br><i>smFP-inc</i>                            | OK371-<br><i>Gal4/UAS-smFP-<br/>inc</i>                               | + | 0.211<br>(0.006) | 43.651<br>(4.304)  | 206.877<br>(20.398) | 0.914<br>(0.388) | 6.235<br>(0.561)  | 2.328<br>(0.432) | 8  | <0.0001 (****),<br>0.8781 (ns),<br><0.0001 (****),<br>0.1448 (ns) |
| S3a-d        | muscle ><br><i>smFP-inc</i>                              | MHC- <i>Gal4/UAS-<br/>smFP-inc</i>                                    | - | 0.397<br>(0.016) | 41.769<br>(2.760)  | 107.062<br>(7.949)  | 3.610<br>(0.597) | 6.929<br>(0.486)  | 2.643<br>(0.363) | 14 | 0.2380 (ns),<br>0.3453 (ns),<br>0.6356 (ns),<br>0.2727 (ns)       |
| not<br>shown | muscle ><br><i>smFP-inc</i>                              | MHC- <i>Gal4/UAS-<br/>smFP-inc</i>                                    | + | 0.199<br>(0.009) | 40.532<br>(3.983)  | 199.679<br>(20.015) | 0.751<br>(0.286) | 6.644<br>(0.354)  | 3.776<br>(0.648) | 9  | <0.0001 (****),<br>0.7945 (ns),<br><0.0001 (****),<br>0.0015 (**) |

| S3e,f                                                                                         | wild type                 | <i>w<sup>1118</sup></i>                         | -    | 0.423<br>(0.011)                                                           | 44.171<br>(3.312)               | 106.268<br>(9.882)                                                          | 2.413<br>(0.263) | 8.100<br>(0.482)       | 2.734<br>(0.905)                           | 10 | -                                                                    |
|-----------------------------------------------------------------------------------------------|---------------------------|-------------------------------------------------|------|----------------------------------------------------------------------------|---------------------------------|-----------------------------------------------------------------------------|------------------|------------------------|--------------------------------------------|----|----------------------------------------------------------------------|
| S3e,f                                                                                         | wild type                 | <i>w<sup>1118</sup></i>                         | +    | 0.179<br>(0.006)                                                           | 37.310<br>(2.348)               | 210.0126<br>(14.121)                                                        | 0.871<br>(0.101) | 7.600<br>(0.542)       | 2.736<br>(0.515)                           | 10 | <0.0001 (****),<br>0.1082 (ns),<br><0.0001 (****),<br><0.0001 (****) |
| S3e,f                                                                                         | <i>inc<sup>smFP</sup></i> | <i>inc<sup>smFP</sup></i>                       | -    | 0.380<br>(0.013)                                                           | 40.186<br>(4.975)               | 108.034<br>(14.523)                                                         | 0.914<br>(0.123) | 5.818<br>(0.296)       | 2.345<br>(0.352)                           | 11 | -                                                                    |
| S3e,f                                                                                         | <i>inc<sup>smFP</sup></i> | <i>inc<sup>smFP</sup></i>                       | +    | 0.238<br>(0.014)                                                           | 48.286<br>(4.277)               | 206.972<br>(19.818)                                                         | 1.050<br>(0.176) | 5.900<br>(0.458)       | 2.917<br>(0.449)                           | 10 | <0.0001 (****),<br>0.2365 (ns),<br>0.0006 (***),<br>0.5271 (ns)      |
| Figure                                                                                        | Label                     | Genotype                                        | PhTx | pCaMKII intensity (% wild type)                                            |                                 | BRP intensity (% wild type)                                                 |                  | n (pCaMKII, BRP)       | P value (significance: pCaMKII, BRP)       |    |                                                                      |
| 3e,f                                                                                          | wild type                 | <i>w<sup>1118</sup></i>                         | -    | 100.000 (4.585)                                                            |                                 | 100.000 (9.194)                                                             |                  | 27, 10                 | -                                          |    |                                                                      |
| 3e,f                                                                                          | wild type                 | <i>w<sup>1118</sup></i>                         | +    | 38.220 (3.565)                                                             |                                 | 149.283 (6.613)                                                             |                  | 14, 11                 | <0.0001 (****), 0.0003 (***)               |    |                                                                      |
| 3e,f                                                                                          | <i>inc<sup>kk3</sup></i>  | <i>inc<sup>kk3</sup></i>                        | -    | 115.120 (8.656)                                                            |                                 | 96.930 (10.672)                                                             |                  | 16, 15                 | 0.1930 (ns), 0.8408 (ns)                   |    |                                                                      |
| 3e,f                                                                                          | <i>inc<sup>kk3</sup></i>  | <i>inc<sup>kk3</sup></i>                        | +    | 53.920 (3.883)                                                             |                                 | 101.273 (13.716)                                                            |                  | 19, 10                 | <0.0001 (****), 0.9394 (ns)                |    |                                                                      |
| pCaMKII significance: <i>inc<sup>kk3</sup></i> +PhTx v.s. wild type+PhTx: 0.2433 (ns)         |                           |                                                 |      |                                                                            |                                 |                                                                             |                  |                        |                                            |    |                                                                      |
| not shown                                                                                     | <i>inc<sup>kk4</sup></i>  | <i>inc<sup>kk4</sup></i>                        | -    | 113.300 (5.848)                                                            |                                 | 100.253 (6.882)                                                             |                  | 17, 11                 | 0.3953 (ns), 0.9819 (ns)                   |    |                                                                      |
| not shown                                                                                     | <i>inc<sup>kk4</sup></i>  | <i>inc<sup>kk4</sup></i>                        | +    | 55.940 (3.1777)                                                            |                                 | 94.549 (14.093)                                                             |                  | 18, 10                 | <0.0001 (****), 0.7399 (ns)                |    |                                                                      |
| Figure                                                                                        | Label                     | Genotype                                        | PhTx | Inc <sup>smFP</sup> intensity – HRP+DLG area (% baseline total NMJ signal) |                                 | Inc <sup>smFP</sup> intensity – Dlg only area (% baseline total NMJ signal) |                  | n                      | P value (significance)                     |    |                                                                      |
| 4a,c                                                                                          | <i>inc<sup>smFP</sup></i> | <i>inc<sup>smFP</sup></i>                       | -    | 77.125 (6.566)                                                             |                                 | 22.875 (4.871)                                                              |                  | 21                     | -                                          |    |                                                                      |
| 4a,c                                                                                          | <i>inc<sup>smFP</sup></i> | <i>inc<sup>smFP</sup></i>                       | +    | 113.730 (8.221)                                                            |                                 | 53.344 (5.757)                                                              |                  | 15                     | HRP: 0.0013 (**)<br>Dlg-HRP: 0.0003 (***)  |    |                                                                      |
| Figure                                                                                        | Label                     | Genotype                                        | PhTx | cytosolic Inc <sup>smFP</sup> intensity (% baseline)                       |                                 |                                                                             |                  | n                      | P value (significance)                     |    |                                                                      |
| not shown                                                                                     | <i>inc<sup>smFP</sup></i> | <i>inc<sup>smFP</sup></i>                       | -    | 100.000 (5.647)                                                            |                                 |                                                                             |                  | 9                      | -                                          |    |                                                                      |
| not shown                                                                                     | <i>inc<sup>smFP</sup></i> | <i>inc<sup>smFP</sup></i>                       | +    | 96.762 (9.371)                                                             |                                 |                                                                             |                  | 9                      | 0.7711 (ns)                                |    |                                                                      |
| Figure                                                                                        | Label                     | Genotype                                        | PhTx | Inc <sup>smFP</sup> intensity – HRP+DLG area (% baseline)                  |                                 | Inc <sup>smFP</sup> intensity – Dlg only area (% baseline)                  |                  | n                      | P value (significance)                     |    |                                                                      |
| 4d,e                                                                                          | presynaptic>Inc RNAi      | <i>inc<sup>smFP</sup>;OK6-Gal4/UAS-Inc RNAi</i> | -    | 100.000 (11.220)                                                           |                                 | 100.000 (16.220)                                                            |                  | 10                     | -                                          |    |                                                                      |
| 4d,e                                                                                          | presynaptic>Inc RNAi      | <i>inc<sup>smFP</sup>;OK6-Gal4/UAS-Inc RNAi</i> | +    | 173.322 (17.114)                                                           |                                 | 177.493 (30.360)                                                            |                  | 11                     | HRP: 0.0024 (**)<br>Dlg-HRP: 0.0415 (*)    |    |                                                                      |
| not shown                                                                                     | presynaptic>Inc RNAi      | <i>inc<sup>smFP</sup>;OK6-Gal4/UAS-Inc RNAi</i> | -    | 47.945 (5.379)                                                             |                                 | 83.204 (13.496)                                                             |                  | 10                     | HRP: 0.0004 (****)<br>Dlg-HRP: 0.6087 (ns) |    |                                                                      |
| not shown                                                                                     | postsynaptic>Inc RNAi     | <i>inc<sup>smFP</sup>;G14-Gal4/UAS-Inc RNAi</i> | -    | 113.335 (12.553)                                                           |                                 | 44.066 (7.378)                                                              |                  | 11                     | HRP: 0.391 (ns)<br>Dlg-HRP: 0.0003 (****)  |    |                                                                      |
| Figure                                                                                        | Label                     | Genotype                                        |      | PhTx                                                                       | Cul3-Flag intensity (%baseline) |                                                                             |                  | n                      | P value (significance)                     |    |                                                                      |
| 4f,g                                                                                          | muscle>Flag-Cul3          | <i>G14-Gal4/UAS-3xHA-3xFlag-Cul3</i>            |      | -                                                                          | 100.000 (2.065)                 |                                                                             |                  | 19                     | -                                          |    |                                                                      |
| 4f,g                                                                                          | muscle>Flag-Cul3          | <i>G14-Gal4/UAS-3xHA-3xFlag-Cul3</i>            |      | +                                                                          | 128.605 (2.775)                 |                                                                             |                  | 18                     | <0.0001 (****)                             |    |                                                                      |
| Figure                                                                                        | Label                     | Genotype                                        | PhTx | αFK2 ubiquitin intensity (% wild type)                                     |                                 | n                                                                           |                  | P value (significance) |                                            |    |                                                                      |
| 5a,c                                                                                          | wild type                 | <i>w<sup>1118</sup></i>                         | -    | 100.000 (6.351)                                                            |                                 | 10                                                                          |                  | -                      |                                            |    |                                                                      |
| 5a,c                                                                                          | wild type                 | <i>w<sup>1118</sup></i>                         | +    | 138.638 (7.950)                                                            |                                 | 10                                                                          |                  | 0.0017 (**)            |                                            |    |                                                                      |
| 5a,c                                                                                          | <i>inc<sup>kk3</sup></i>  | <i>inc<sup>kk3</sup></i>                        | -    | 112.068 (5.885)                                                            |                                 | 10                                                                          |                  | 0.6010 (ns)            |                                            |    |                                                                      |
| 5a,c                                                                                          | <i>inc<sup>kk3</sup></i>  | <i>inc<sup>kk3</sup></i>                        | +    | 102.165 (6.983)                                                            |                                 | 10                                                                          |                  | 0.9960 (ns)            |                                            |    |                                                                      |
| αFK2 significance: <i>inc<sup>kk3</sup></i> +PhTx v.s. <i>inc<sup>kk3</sup></i> : 0.7364 (ns) |                           |                                                 |      |                                                                            |                                 |                                                                             |                  |                        |                                            |    |                                                                      |
| Figure                                                                                        | Label                     | Genotype                                        | PhTx | αFK1 ubiquitin intensity (%wild type)                                      |                                 | n                                                                           |                  | P value (significance) |                                            |    |                                                                      |

| 5a,d                                                                                          | wild type                                     | <i>w<sup>1118</sup></i>                            | -                       | 100.000 (8.422)                        | 17                              | -                      |                                          |
|-----------------------------------------------------------------------------------------------|-----------------------------------------------|----------------------------------------------------|-------------------------|----------------------------------------|---------------------------------|------------------------|------------------------------------------|
| 5a,d                                                                                          | wild type                                     | <i>w<sup>1118</sup></i>                            | +                       | 116.907 (11.569)                       | 14                              | 0.6677 (ns)            |                                          |
| 5a,d                                                                                          | <i>inc<sup>kk3</sup></i>                      | <i>inc<sup>kk3</sup></i>                           | -                       | 105.744 (9.796)                        | 21                              | 0.9736 (ns)            |                                          |
| 5a,d                                                                                          | <i>inc<sup>kk3</sup></i>                      | <i>inc<sup>kk3</sup></i>                           | +                       | 121.628 (8.672)                        | 22                              | 0.3707 (ns)            |                                          |
| αFK1 significance: <i>inc<sup>kk3</sup></i> +PhTx v.s. <i>inc<sup>kk3</sup></i> : 0.5885 (ns) |                                               |                                                    |                         |                                        |                                 |                        |                                          |
| Figure                                                                                        | Label                                         | Genotype                                           | PhTx                    | αFK2 ubiquitin intensity (% wild type) | n                               | P value (significance) |                                          |
| 5e,f                                                                                          | wild type                                     | <i>w<sup>1118</sup></i>                            | -                       | 100.000 (8.335)                        | 16                              |                        |                                          |
| not shown                                                                                     | wild type                                     | <i>w<sup>1118</sup></i>                            | +                       | 148.473 (17.647)                       | 13                              | 0.0136 (*)             |                                          |
| 5e,f                                                                                          | presynaptic rescue                            | <i>inc<sup>kk3/y</sup>;OK371-Gal4/UAS-smFP-Inc</i> | -                       | 111.553 (13.162)                       | 10                              | 0.4421 (ns)            |                                          |
| 5e,f                                                                                          | presynaptic rescue                            | <i>inc<sup>kk3/y</sup>;OK371-Gal4/UAS-smFP-Inc</i> | +                       | 129.665 (15.374)                       | 10                              | 0.3867 (ns)            |                                          |
| 5e,f                                                                                          | postsynaptic rescue                           | <i>inc<sup>kk3/y</sup>;G14-Gal4/UAS-smFP-Inc</i>   | -                       | 85.138 (9.186)                         | 12                              | 0.2448 (ns)            |                                          |
| 5e,f                                                                                          | postsynaptic rescue                           | <i>inc<sup>kk3/y</sup>;G14-Gal4/UAS-smFP-Inc</i>   | +                       | 147.708 (20.738)                       | 11                              | 0.0098 (**)            |                                          |
| Figure                                                                                        | Label                                         | Genotype                                           | Total daily sleep (min) |                                        | n                               | P value (significance) |                                          |
| S1g                                                                                           | wild type                                     | <i>w<sup>1118</sup></i>                            | 731.18 (25.15)          |                                        | 30                              | -                      |                                          |
| S1g                                                                                           | <i>inc<sup>2/1</sup></i>                      | <i>inc<sup>2</sup>/inc<sup>1</sup></i>             | 501.98 (38.94)          |                                        | 28                              | p<0.0001 (****)        |                                          |
| S1g                                                                                           | <i>inc<sup>kk3/1</sup></i>                    | <i>inc<sup>kk3</sup>/inc<sup>1</sup></i>           | 418.63 (35.93)          |                                        | 25                              | p<0.0001 (****)        |                                          |
| S1g                                                                                           | <i>inc<sup>kk4/1</sup></i>                    | <i>inc<sup>kk4</sup>/inc<sup>1</sup></i>           | 334.18 (63.61)          |                                        | 10                              | p<0.0001 (****)        |                                          |
| Figure                                                                                        | Label                                         | Genotype                                           | Total daily sleep (min) |                                        | n                               | P value (significance) |                                          |
| S1h                                                                                           | wild type                                     | <i>w<sup>1118</sup></i>                            | 996.16 (20.62)          |                                        | 27                              | -                      |                                          |
| S1h                                                                                           | <i>UAS-smFP-Inc/+</i>                         | <i>UAS-smFP-Inc/+</i>                              | 934.51 (20.75)          |                                        | 28                              | ns                     |                                          |
| S1h                                                                                           | <i>inc<sup>1</sup>, inc-Gal4/+</i>            | <i>inc<sup>1</sup>, inc-Gal4/+</i>                 | 480.94 (31.69)          |                                        | 16                              | p<0.0001 (****)        |                                          |
| S1h                                                                                           | <i>inc<sup>1</sup>, inc-Gal4/UAS-smFP-Inc</i> | <i>inc<sup>1</sup>, inc-Gal4/UAS-smFP-Inc</i>      | 952.90 (16.52)          |                                        | 43                              | ns                     |                                          |
| Figure                                                                                        | Label                                         | Genotype                                           | PhTx                    | GluRIIA intensity (% wild type)        | GluRIID intensity (% wild type) | n                      | P value (significance: GluRIIA, GluRIID) |
| S2a,b                                                                                         | wild type                                     | <i>w<sup>1118</sup></i>                            | -                       | 100.000 (5.262)                        | 100.000 (3.948)                 | 10                     | -                                        |
| S2a,b                                                                                         | <i>inc<sup>kk3</sup></i>                      | <i>inc<sup>kk3</sup></i>                           | -                       | 93.777 (6.088)                         | 103.001 (5.910)                 | 13                     | 0.4643 (ns), 0.6968 (ns)                 |
| not shown                                                                                     | <i>inc<sup>kk4</sup></i>                      | <i>inc<sup>kk4</sup></i>                           | -                       | 100.528 (7.178)                        | 111.965 (7.701)                 | 15                     | 0.9576 (ns), 0.2446 (ns)                 |

## Supplementary References

- 1 Bennett, E. J., Rush, J., Gygi, S. P. & Harper, J. W. Dynamics of cullin-RING ubiquitin ligase network revealed by systematic quantitative proteomics. *Cell* 143, 951-965 (2010).
- 2 Giot, L. et al. A protein interaction map of *Drosophila melanogaster*. *Science* 302, 1727-1736 (2003).
- 3 Hein, M. Y. et al. A human interactome in three quantitative dimensions organized by stoichiometries and abundances. *Cell* 163, 712-723 (2015).
- 4 Hudson, A. M., Mannix, K. M. & Cooley, L. Actin Cytoskeletal Organization in *Drosophila* Germline Ring Canals Depends on Kelch Function in a Cullin-RING E3 Ligase. *Genetics* 201, 1117-1131 (2015).
- 5 Hutchins, J. R. et al. Systematic analysis of human protein complexes identifies chromosome segregation proteins. *Science* 328, 593-599 (2010).
- 6 McGourty, C. A. et al. Regulation of the CUL3 Ubiquitin Ligase by a Calcium-Dependent Co-adaptor. *Cell* 167, 525-538 e514 (2016).
- 7 Wang, J. et al. Toward an understanding of the protein interaction network of the human liver. *Mol Syst Biol* 7, 536 (2011).
